# Supplementary material
Source: Springer Nature journal article supplement (https://www.springermedizin.de/resource/supplementary/12987_2007_291_MOESM4_ESM.pdf/9611698)

**A.**

*PLASMA*

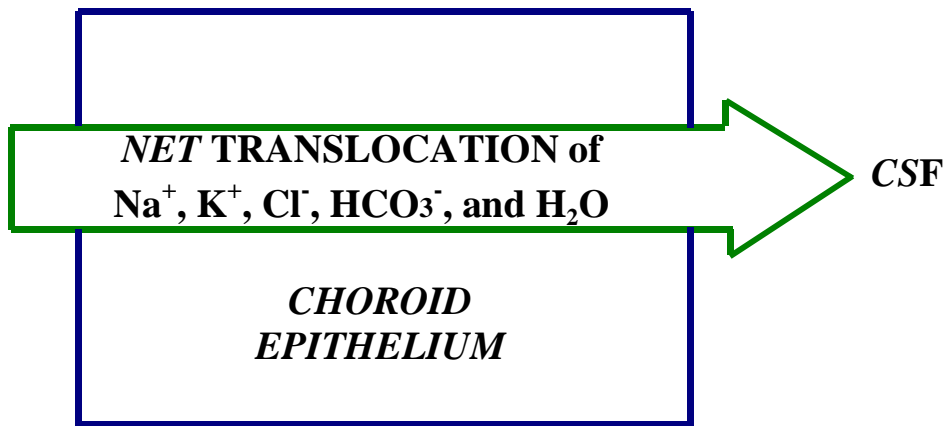

**B.**

*PLASMA*

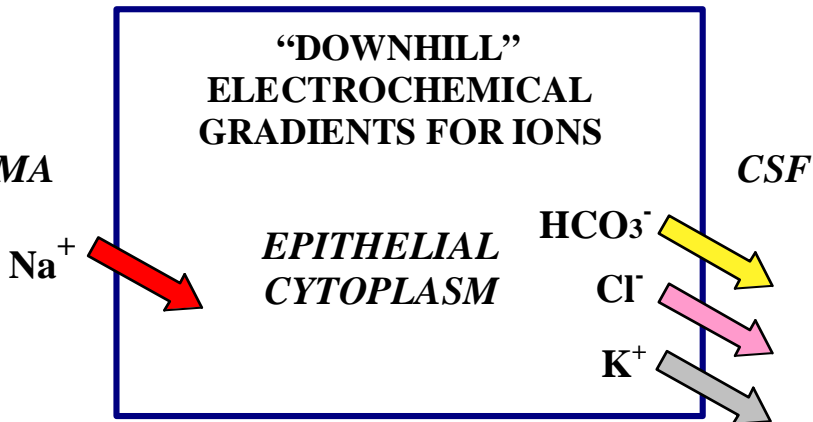

Supplement: MOESM4 [file 9611698]
